# Supplementary material for: Enzymatic Characterization of Purified β-Glucosidase from Non-Saccharomyces Yeasts and Application on Chardonnay Aging
Source: MDPI journal article supplement (doi:10.3390/foods11060852), 2022-03-17
Supplement: s1 [file s1]

**Supplementary Table S1** Qualitative and quantitative information of eleven chromatographically pure standards and their calibration curves,  $R^2$  values, and linear ranges.

| Compounds         | Purity             | CAS in Sigma     | CAS        | Density             | Linear rang<br>(mg/L) | Calibration curves                    | $R^2$ value |
|-------------------|--------------------|------------------|------------|---------------------|-----------------------|---------------------------------------|-------------|
| Benzyl alcohol    | 99.8%(GC)          | 305197-100ML     | 100-51-6   | 1.045 g/mL at 25 °C | 0.13-1.96             | $y = 2 \times 10^7 x - 7 \times 10^5$ | 0.9900      |
| Ethyl heptanoate  | 99.0%(GC)          | 112364-100ML     | 106-30-9   | 0.870 g/mL at 25 °C | 0.01-3.26             | $y = 2 \times 10^9 x + 1 \times 10^8$ | 0.9907      |
| Hexanol           | $\geq 99.9\%$ (GC) | 73117-1ML-F      | 111-27-3   | 0.814 g/mL at 25 °C | 0.01-1.53             | $y = 4 \times 10^7 x + 2 \times 10^6$ | 0.9982      |
| Hexanoic acid     | $\geq 99.0\%$ (GC) | 21529-5ML        | 142-62-1   | 0.927 g/mL at 25 °C | 0.29-4.64             | $y = 5 \times 10^6 x + 1 \times 10^6$ | 0.9938      |
| Octanoic acid     | 99.5%(GC)          | 21639-5ML        | 124-07-2   | 0.910 g/mL at 25 °C | 0.11-3.41             | $y = 5 \times 10^6 x + 8 \times 10^5$ | 0.9731      |
| Ethyl butyrate    | 99.0%(GC)          | E15701-500ML     | 105-54-4   | 0.875 g/mL at 25 °C | 0.02-2.19             | $y = 6 \times 10^7 x + 3 \times 10^6$ | 0.9970      |
| Ethyl caproate    | 99.0%(GC)          | 148970-100ML     | 110-38-3   | 0.862 g/mL at 25 °C | 0.11-4.31             | $y = 3 \times 10^9 x - 2 \times 10^8$ | 0.9880      |
| 2-Phenylethanol   | 99.0%(GC)          | 77861-250ML      | 60-12-8    | 1.020 g/mL at 20 °C | 0.26-15.30            | $y = 3 \times 10^7 x + 2 \times 10^7$ | 0.9893      |
| Phenethyl acetate | 97.0%(GC)          | W285706-SAMPLE-K | 103-45-7   | 1.032 g/mL at 25 °C | 0.01-1.94             | $y = 5 \times 10^8 x + 5 \times 10^6$ | 0.9932      |
| Citronellol       | 95.0%(GC)          | W230901-SAMPLE-K | 106-22-9   | 0.855 g/mL at 25 °C | 0.11-2.14             | $y = 3 \times 10^6 x + 1 \times 10^6$ | 0.9963      |
| Damascenone       | $\geq 90.0\%$ (GC) | 30395-1ML        | 23726-91-2 | 0.934 g/mL at 20 °C | 0.06-3.50             | $y = 3 \times 10^7 x + 2 \times 10^6$ | 0.9994      |
| 2-octanol         | 99.5%(GC)          | 74858-25mL       | 123-96-6   | 0.819 g/mL at 20 °C | /                     | /                                     | /           |
